# Supplementary material for: Nighres: processing tools for high-resolution neuroimaging
Source: PubMed Central journal article supplement (PMC6065481; doi:10.1093/gigascience/giy082), 2018-07-04
Supplement: giy082_response_to_reviewer_comments_original_submission.pdf [file giy082_response_to_reviewer_comments_original_submission.pdf]

## Author's Response To Reviewer Comments

Close

We have now included the reference to the GigaDB entry in the section "Availability of supporting data".

Close
